## Dedication

To my mother  
Minnie Ellis James Washington  
who sang to me  
before my ears knew the sounds

*Willis Laurence James*

### Stars in de Elements

"Stars in de Elements": eternal torchbearers which lift the fog-bound soul above the clouds, guide him upon the storm-tossed sea, tune his soul with the infinite, and shine best when darkness is deepest—given birth by the night.

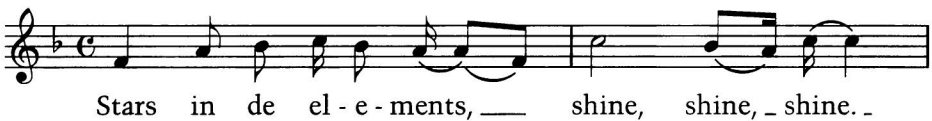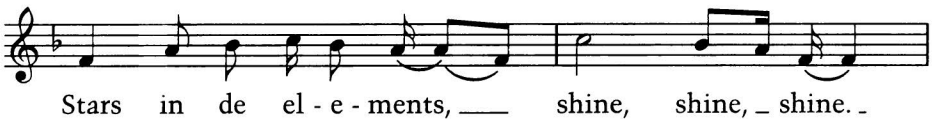

Source: https://dup.silverchair.com/black-sacred-music/article-pdf/9/1-2/xv/1555158/xvjames.pdf
